# Supplementary material for: Alterations in Gut Vitamin and Amino Acid Metabolism are Associated with Symptoms and Neurodevelopment in Children with Autism Spectrum Disorder
Source: J Autism Dev Disord. 2021 Jul 14;52(7):3116–28. doi: 10.1007/s10803-021-05066-w (PMC9213278; doi:10.1007/s10803-021-05066-w)
Supplement: Supplementary file 2 — Supplementary file2 (XLSX 26 kb) List of identified differential gut metabolites between the ASD and TD children. [file 10803_2021_5066_MOESM2_ESM.xlsx]

## Sheet: Table S1
Table S1 Identified differential gut metabolites between the ASD and TD children
	ID	Name	TD-mean peak area	ASD-mean peak area	Fold change (ASD_mean/TD_mean)	P value（ FDR）	VIP	Regulation mode of ASD	RT [min]	Formula	Molecular Weight	ChemSpider_Results	mzCloud_Results	mzVault_Results	Ralated pathways
1	Com_10422_pos	N-Phenylacetylglutamic acid	631744	275495	0.436086	0.00837673	1.8164	Down	8.427	C13 H15 N O5	265.095	Full match	No results	No results	Alanine, aspartate and glutamate metabolism
2	Com_10829_pos	3,4-dihydroxyphenylacetic acid	232261	84966.3	0.365822	0.0495609	1.56803	Down	10.802	C8 H8 O4	168.042	Full match	No results	No results	Phenylalanine metabolism
3	Com_12607_pos	Oleoyl tyrosine	468833	122795	0.261917	0.000588317	3.98266	Down	10.747	C27 H43 N O4	445.319	Full match	No results	No results	Tyrosine metabolism
4	Com_13816_pos	Glucuronamide	795464	464240	0.583609	0.0221676	1.93193	Down	1.901	C6 H11 N O6	193.059	Full match	No results	No results
5	Com_13924_pos	Agmatine	330209	167381	0.506895	0.0110753	1.94121	Down	1.173	C5 H14 N4	130.122	Full match	No results	No results	Arginine and proline metabolism
6	Com_19313_pos	Trihomomethionine	132457	74610.5	0.563283	0.00551479	2.36721	Down	7.854	C8 H17 N O2 S	191.098	Full match	No results	No results	2-Oxocarboxylic acid metabolism
7	Com_19591_pos	Galactosyl sphingosine	588407	364600	0.619638	0.00431509	1.80685	Down	14.142	C24 H47 N O7	461.335	Full match	No results	No results	Sphingolipid metabolism
8	Com_20481_pos	Retinol	577111	372159	0.644865	0.01487	1.39988	Down	14.308	C20 H30 O	286.23	Full match	No results	No results	Retinol metabolism，Vitamin digestion and absorption
9	Com_22559_pos	Thiamine pyrophosphate	75907	34054.3	0.448632	0.00557438	1.32063	Down	11.363	C12 H19 N4 O7 P2 S	425.046	Full match	No results	No results	Thiamine metabolism
10	Com_24429_pos	Riboflavin tetrabutyrate	114727	23972.1	0.208949	0.00853679	2.50992	Down	8.705	C33 H44 N4 O10	656.308	Full match	No results	No results	Riboflavin metabolism
11	Com_29080_pos	Leukotriene B4	212999	129741	0.609115	0.00208538	1.55588	Down	11.735	C20 H32 O4	336.23	Full match	No results	No results	Arachidonic acid metabolism
12	Com_38365_pos	Tiglyl carnitine	258619	118858	0.459586	1.00285e-07	3.53763	Down	8.674	C12 H21 N O4	243.147	Full match	No results	No results	Cysteine and methionine metabolism
13	Com_39648_pos	Spermine	37971.8	17306.6	0.455775	0.0422308	1.41251	Down	8.158	C10 H26 N4	202.216	Full match	No results	No results	Arginine and proline metabolism
14	Com_406_pos	5-Hydroxyindoleacetic acid	1.54611e+07	9.71537e+06	0.628375	0.00801762	2.44998	Down	8.435	C10 H9 N O3	191.058	Full match	Full match	No results	Tryptophan metabolism
15	Com_4072_pos	Putrescine	4.60077e+06	2.78628e+06	0.605613	0.0197622	2.70612	Down	1.146	C4 H12 N2	88.1001	Full match	Full match	No results	Arginine and proline metabolism，Glutathione metabolism，Protein digestion and absorption
16	Com_4149_pos	N1,N12-Diacetylspermine	4.79271e+06	2.93432e+06	0.612246	0.00488623	3.74805	Down	1.342	C14 H30 N4 O2	286.237	Full match	No results	No results	Arginine and proline metabolism
17	Com_4224_pos	(R)-Equol	948865	579475	0.610704	0.0440469	2.32521	Down	10.725	C15 H14 O3	242.094	Not the top hit	Full match	No results
18	Com_530_pos	L (-)-Carnitine	2.5857e+07	1.09797e+07	0.424633	2.80144e-05	3.19786	Down	1.38	C7 H15 N O3	161.105	Full match	Full match	No results	Cysteine and methionine metabolism
19	Com_61756_pos	(+)-Riboflavin	80299.6	49902.4	0.621452	0.0305006	1.39689	Down	7.683	C17 H20 N4 O6	376.138	Full match	No results	No results	Riboflavin metabolism
20	Com_6197_pos	5-trans prostaglandin F2β	1.18695e+06	389543	0.328189	0.000237571	3.87677	Down	11.755	C20 H34 O5	376.223	No results	Invalid mass	No results	Arachidonic acid metabolism
21	Com_62215_pos	DL-Glutamine	147710	91471.3	0.619264	4.86753e-05	1.21109	Down	10.292	C5 H10 N2 O3	146.069	Full match	No results	No results	Alanine, aspartate and glutamate metabolism
22	Com_62527_pos	Dihydrofolic acid	57580.1	36770.5	0.638597	0.0126967	1.10795	Down	10.655	C19 H21 N7 O6	443.155	Full match	No results	No results	Folate biosynthesis
23	Com_6417_pos	Vitamin C	1.94569e+06	1.1271e+06	0.579279	0.0147939	2.05892	Down	1.909	C6 H8 O6	176.032	Full match	No results	No results	Ascorbate and aldarate metabolism，Vitamin digestion and absorption
24	Com_644_pos	Creatinine	2.54307e+07	1.53383e+07	0.603141	0.00702092	3.31805	Down	1.315	C4 H7 N3 O	113.059	Partial match	Full match	Full match	Arginine and proline metabolism
25	Com_75189_pos	S-Aminoethyl-L-cysteine	15857.4	10276.7	0.648065	0.0217357	1.64838	Down	10.79	C5 H12 N2 O2 S	164.063	Full match	No results	No results	Cysteine and methionine metabolism
26	Com_7634_pos	N6-Acetyl-L-lysine	5.46355e+06	3.55705e+06	0.651051	0.00019801	1.79236	Down	1.523	C8 H16 N2 O3	188.116	Partial match	Full match	No results	Lysine degradation
27	Com_8340_pos	Cytosine	2.4481e+06	1.56457e+06	0.639097	0.0261342	1.68565	Down	1.415	C4 H5 N3 O	111.043	Partial match	Full match	No results	Purine metabolism
28	Com_84098_pos	S-(PGA1)-glutathione	16874.8	10652.7	0.631279	0.00766049	1.01593	Down	8.673	C30 H49 N3 O10 S	643.317	Full match	No results	No results	Glutathione metabolism
29	Com_8878_pos	Estrane	542284	334967	0.617697	0.0099824	1.81262	Down	13.309	C18 H30	246.235	Full match	No results	No results	Steroid hormone biosynthesis，Sphingolipid metabolism
30	Com_1125_neg	L-Ascorbic acid	1.40603e+06	713679	0.507585	0.00312269	2.80431	Down	1.109	C6 H8 O9 S	255.99	Full match	Full match	No results	Ascorbate and aldarate metabolism，Vitamin digestion and absorption
31	Com_11677_neg	6-Hydroxymelatonin	614352	386999	0.629929	0.0179048	1.46279	Down	6.301	C13 H16 N2 O3	248.117	Full match	No results	No results	Tryptophan metabolism
32	Com_12020_neg	2,3-Diaminopropionic acid	106488	53353.3	0.501026	0.0270575	1.20387	Down	1.254	C3 H8 N2 O2	104.059	Full match	Full match	No results	Alanine, aspartate and glutamate metabolism
33	Com_1262_neg	3-(Sulfooxy)butanoic acid	8.10189e+06	4.88385e+06	0.602804	0.00129634	1.62768	Down	1.177	C4 H8 O6 S	184.005	Full match	No results	No results
34	Com_14560_neg	Pyridoxamine	733050	462532	0.63097	0.00346546	1.71469	Down	1.45	C8 H12 N2 O2	168.09	Full match	No results	No results	Vitamin B6 metabolism
35	Com_1536_neg	11-Deoxy prostaglandin F2β	1.92581e+06	316069	0.164122	5.91492e-05	3.67097	Down	12.305	C20 H34 O4	338.247	Partial match	Full match	No results	Arachidonic acid metabolism
36	Com_1584_neg	15S-hydroxyeicosatrienoic acid	3.86555e+06	1.01271e+06	0.261985	0.00018609	2.70533	Down	13.282	C20 H34 O3	322.252	Full match	No results	No results	Biosynthesis of unsaturated fatty acids
37	Com_17419_neg	Indoxyl sulfate	18736.4	5737.24	0.306209	0.0161455	1.76502	Down	7.941	C8 H7 N O4 S	213.01	Full match	No results	No results
38	Com_1943_neg	1,4,5,6-tetrahydro-6-oxonicotinic acid	9.04527e+06	5.95763e+06	0.658646	0.00362034	1.92365	Down	1.432	C6 H7 N O3	141.043	Full match	No results	No results	Nicotinate and nicotinamide metabolism
39	Com_19870_neg	Indole-2-carboxylic acid	139579	81985.7	0.58738	0.00225032	1.21597	Down	5.225	C9 H7 N O2	161.048	Full match	Full match	No results	Tryptophan metabolism
40	Com_19937_neg	7,8-dihydroxykynurenic acid	66881.6	34211.5	0.511523	0.0094919	1.98764	Down	6.883	C10 H7 N O5	221.033	Full match	No results	No results	Tryptophan metabolism
41	Com_20715_neg	6-(Isopropylthio)purine	49603.3	32175.1	0.648648	0.019523	1.90188	Down	1.643	C8 H10 N4 S	194.062	Full match	No results	No results	Purine metabolism
42	Com_21298_neg	Methionyl methionine	65498	36105.8	0.551251	0.0174918	1.04756	Down	1.231	C10 H20 N2 O3 S2	280.091	Full match	No results	No results	Cysteine and methionine metabolism
43	Com_2282_neg	γ-Aminobutyric acid	1.06595e+07	5.89319e+06	0.552856	0.00551403	1.73009	Down	1.23	C4 H9 N O2	103.064	Full match	Full match	No results	Alanine, aspartate and glutamate metabolism
44	Com_23305_neg	Indoleacetyl glutamic acid	108003	68714.3	0.636225	0.0493831	1.16019	Down	7.599	C15 H16 N2 O5	304.107	Full match	No results	No results	Alanine, aspartate and glutamate metabolism
45	Com_25492_neg	Butyrin	105503	68462.1	0.648909	0.00122696	1.42428	Down	7.738	C15 H26 O6	302.174	Full match	No results	No results
46	Com_27401_neg	p-coumaroylagmatine	65068.6	40673.1	0.62508	0.0124062	1.41332	Down	5.725	C14 H20 N4 O2	276.158	Full match	No results	No results	Arginine and proline metabolism
47	Com_2791_neg	2-Sulfosuccinic acid	2.50632e+06	1.35431e+06	0.540358	0.000133709	2.82347	Down	1.119	C4 H6 O7 S	197.984	Full match	No results	No results	Citrate cycle (TCA cycle)，2-Oxocarboxylic acid metabolism
48	Com_29131_neg	Fructosyl glycine	42501.5	27338.5	0.643236	0.00792897	1.80938	Down	7.937	C8 H15 N O7	237.084	Full match	No results	No results	Glycine, serine and threonine metabolism
49	Com_3495_neg	5-Hydroxylysine	562046	347836	0.618874	0.0289263	1.78384	Down	1.277	C6 H14 N2 O3	162.101	Full match	Full match	No results	Lysine degradation
50	Com_36035_neg	Phosphopantothenic acid	50753.1	32590.7	0.642141	0.0180923	1.72862	Down	1.178	C9 H18 N O8 P	299.076	Full match	No results	No results	Vitamin digestion and absorption
51	Com_3671_neg	5-Methyltetrahydrofolate	827813	460512	0.5563	0.00675497	2.05843	Down	1.408	C20 H25 N7 O6	459.187	Full match	No results	No results	Folate biosynthesis，One carbon pool by folate
52	Com_40294_neg	Hexadecyl beta-D-glucopyranosiduronic acid	35464.9	27000.5	0.761331	0.000219859	1.09431	Down	11.589	C22 H42 O7	418.294	Full match	No results	No results
53	Com_4547_neg	13,14-Dihydro-15-keto Prostaglandin J2	605338	266823	0.440784	1.02031e-05	3.08631	Down	13.574	C20 H30 O4	316.205	No match	Invalid mass	No match	Arachidonic acid metabolism
54	Com_5081_neg	N-feruloyl glycine	389195	177118	0.455089	0.0240283	1.83097	Down	1.394	C12 H13 N O5	251.078	Full match	No results	No results	Glycine, serine and threonine metabolism
55	Com_5603_neg	Dehydrocholic acid	403296	197208	0.488992	0.00286463	1.89292	Down	9.977	C24 H34 O5	402.242	Full match	Full match	Full match	Primary bile acid biosynthesis
56	Com_686_neg	Hippuric acid	3.49285e+06	461631	0.132164	0.000931871	3.06425	Down	5.319	C9 H9 N O3	179.059	Full match	Full match	No results	Phenylalanine metabolism
57	Com_7065_neg	Sulfurous acid	554995	360673	0.649867	0.000911132	1.74297	Down	1.173	H2 O3 S	81.9728	Full match	No results	No results	Cysteine and methionine metabolism，Taurine and hypotaurine metabolism
58	Com_751_neg	Glutathionyl spermidine	2.99872e+06	29132.8	0.00971509	0.000709016	3.51234	Down	8.638	C17 H34 N6 O5 S	434.233	Full match	No results	No results	Glutathione metabolism，Arginine and proline metabolism
59	Com_8926_neg	N-Acetyl-L-cysteine	435756	268976	0.617264	0.00500092	1.16386	Down	1.399	C5 H9 N O3 S	163.031	Full match	No results	No results	Cysteine and methionine metabolism
60	Com_9404_neg	Lumichrome	942036	600411	0.637354	0.00501313	1.97845	Down	1.401	C12 H10 N4 O2	242.08	Full match	No results	No results	Riboflavin metabolism
61	Com_9709_neg	Indole acrylic acid	40782.3	27397.8	0.671807	0.00283386	1.10873	Down	6.68	C11 H9 N O2	187.064	Full match	No results	No results	Tryptophan metabolism
62	Com_13453_pos	2'-deoxy-5-hydroxymethyl-CDP	222522	539505	2.42451	0.0253474	2.67553	up	8.097	C10 H17 N3 O11 P2	417.036	Full match	No results	No results
63	Com_13784_pos	Xanthurenic acid	694856	1.0603e+06	1.52593	0.012743	1.93709	up	7.147	C10 H7 N O4	205.037	Full match	Full match	Full match	Tryptophan metabolism
64	Com_25721_pos	N-Feruloylserotonin	48523.8	83654.3	1.72399	0.0118154	1.98772	up	9.151	C20 H20 N2 O4	352.142	Full match	No results	No results	Tryptophan metabolism
65	Com_27454_pos	L-(+)-ergothioneine	43893.8	71346	1.62542	0.0206245	1.41504	up	6.708	C9 H15 N3 O2 S	229.088	Full match	No results	No results
66	Com_299_pos	15-Deoxy-12,14-prostaglandin A1	2.63332e+06	1.0502e+07	3.98813	0.00403672	2.49934	up	13.739	C20 H30 O3	318.219	Partial match	Full match	Full match	Arachidonic acid metabolism
67	Com_30561_pos	4-hydroxy-4-(indol-3-ylmethyl) glutamic acid	47167.1	105218	2.23075	0.0108459	1.83392	up	7.669	C14 H16 N2 O5	292.105	Full match	No results	No results	Alanine, aspartate and glutamate metabolism
68	Com_31253_pos	N-Acetylleucylleucine	46951.2	94696.7	2.01692	0.000305651	1.64988	up	11.398	C14 H26 N2 O4	286.189	Full match	No results	No results
69	Com_35298_pos	All-trans-Retinal	84515.5	131700	1.5583	0.0262322	1.7729	up	14.866	C20 H28 O	284.214	Full match	No results	No results	Retinol metabolism，Vitamin digestion and absorption
70	Com_3583_pos	2-Hydroxypropyl stearate	678479	2.60549e+06	3.84019	1.38412e-05	5.19858	up	15.814	C21 H42 O3	342.314	Full match	No results	No results
71	Com_35923_pos	Glycerol phenylbutyrate	106074	162128	1.52844	0.0358537	1.22688	up	11.29	C33 H38 O6	530.266	Full match	No results	No results
72	Com_40316_pos	Serotonin	63548.9	118446	1.86386	0.00593315	1.5369	up	7.695	C10 H12 N2 O	176.095	Full match	No results	No results	Tryptophan metabolism
73	Com_4506_pos	Tryptamine	1.45705e+06	2.18709e+06	1.50104	0.00587126	3.78599	up	6.698	C10 H12 N2	160.1	Full match	Full match	Full match
74	Com_47800_pos	5-Hydroxy-DL-tryptophan	41631.1	78229.5	1.87911	0.00019147	1.95281	up	8.511	C11 H12 N2 O3	220.085	Full match	No results	No results	Tryptophan metabolism
75	Com_48112_pos	5-Hydroxy-N-formylkynurenine	19720.6	45125.9	2.28826	0.00718195	1.43842	up	8.14	C11 H12 N2 O5	252.074	Full match	No results	No results	Tryptophan metabolism
76	Com_515_pos	4-Phenylbutyric acid	1.46551e+07	2.34965e+07	1.6033	0.000204888	2.57818	up	14.313	C10 H12 O2	164.084	Partial match	Full match	No results
77	Com_5518_pos	Cholest-4,6-Dien-3-One	2.62178e+06	4.06617e+06	1.55092	0.00354668	1.97052	up	13.172	C27 H42 O	382.324	Partial match	No results	Full match
78	Com_57972_pos	4-Nitrosobiphenyl	61682.1	106935	1.73364	0.00232235	2.11189	up	8.735	C12 H9 N O	183.068	Full match	No results	No results
79	Com_60855_pos	b,e-Carotene-3,3'-diol	91604.2	142432	1.55486	0.00433925	1.25878	up	15.299	C40 H56 O2	568.428	Full match	No results	No results	Retinol metabolism，Vitamin digestion and absorption
80	Com_6245_pos	N,N-Dimethylsphingosine	2.34557e+06	4.14067e+06	1.76532	0.00333199	3.57932	up	15.342	C20 H41 N O2	327.314	Not the top hit	Full match	No results	Sphingolipid metabolism
81	Com_6452_pos	2-oxo-8-methylthiooctanoic acid	2.17353e+06	3.54259e+06	1.62988	0.0220305	2.15233	up	1.53	C9 H16 O3 S	204.083	Full match	No results	No results
82	Com_6488_pos	8-hydroxy-deoxyguanosine	126276	866476	6.86176	0.00122462	3.14975	up	8.141	C10 H13 N5 O5	283.093	Full match	No results	No results	Purine metabolism
83	Com_66601_pos	4'-apo-beta-carotenal	44286.3	68612	1.54929	9.23843e-05	1.87181	up	15.94	C35 H46 O	482.354	Full match	No results	No results	Retinol metabolism
84	Com_72577_pos	(-)-Chorismic acid	17410.6	26370.1	1.5146	0.00203245	1.19385	up	7.746	C10 H10 O6	226.047	Full match	No results	No results
85	Com_7468_pos	Epiguanine	215134	1.01516e+06	4.71873	0.0184954	2.39599	up	7.697	C6 H7 N5 O	165.066	Full match	No results	No results	Purine metabolism
86	Com_8610_pos	Tocopherol	185673	592881	3.19315	0.00197368	2.58638	up	14.679	C29 H50 O2	430.381	Full match	No results	No results
87	Com_8611_pos	Estradiol enanthate	1.40848e+06	2.60581e+06	1.85009	0.00155416	2.36105	up	14.406	C25 H36 O3	384.266	Full match	No results	No results	Steroid hormone biosynthesis
88	Com_1165_neg	Arachidic acid	518165	1.40049e+06	2.70278	0.000375267	3.09903	up	15.069	C20 H40 O2	312.304	Full match	No results	No results	Arachidonic acid metabolism
89	Com_14912_neg	DL-Homocysteine	14923.8	28918.6	1.93775	0.0328503	1.62512	up	7.51	C4 H9 N O2 S	135.036	Full match	No results	No results	Cysteine and methionine metabolism，Alanine, aspartate and glutamate metabolism
90	Com_20182_neg	6-deoxoteasterone	40392.2	74961.8	1.85585	0.0018533	1.17303	up	14.6	C28 H50 O3	434.377	Full match	No results	No results	Steroid hormone biosynthesis
91	Com_2021_neg	3-dehydro-6-deoxoteasterone	1.41608e+06	3.1559e+06	2.22861	0.000916035	2.25066	up	15.2	C28 H48 O3	432.362	Full match	No results	No results	Steroid hormone biosynthesis
92	Com_23657_neg	4-(aminomethyl)benzoic acid	40846.7	102246	2.50317	1.53975e-07	3.28099	up	12.829	C36 H39 N O5	565.284	Full match	No results	No results
93	Com_3369_neg	5beta-cholanoic acid	46948.8	192575	4.10182	0.000445117	2.35965	up	15.044	C24 H40 O2	360.304	Full match	No results	No results	Primary bile acid biosynthesis
94	Com_4999_neg	3',5'-Cyclic dAMP	8118.25	71414.8	8.79681	0.0145433	1.65175	up	6.874	C10 H12 N5 O5 P	313.057	Full match	No results	No results	Purine metabolism
95	Com_726_neg	Cyclohexane-1,2-diaminetetraacetic acid	506626	3.33084e+06	6.57455	0.000586938	2.7576	up	1.399	C14 H22 N2 O8	346.139	Full match	No results	No results	Protein digestion and absorption
96	Com_7350_neg	20-hydroxy-leukotriene E4	56716.2	237534	4.18812	0.00789477	2.04833	up	11.013	C23 H37 N O6 S	455.236	Full match	No results	No results	Arachidonic acid metabolism
ID"_pos“ metabolites detected in the positive ion mode ，ID"_neg“ metabolites detected in the negative ion mode ,TD = typically developing; ASD = autism spectrum disorders.
