# Supplementary material for: Alterations in Gut Vitamin and Amino Acid Metabolism are Associated with Symptoms and Neurodevelopment in Children with Autism Spectrum Disorder
Source: J Autism Dev Disord. 2021 Jul 14;52(7):3116–28. doi: 10.1007/s10803-021-05066-w (PMC9213278; doi:10.1007/s10803-021-05066-w)
Supplement: Supplementary file 3 — Supplementary file3 (XLSX 12 kb) KEGG pathway analysis of differential gut metabolites between the autistic and typical developing children. [file 10803_2021_5066_MOESM3_ESM.xlsx]

## Sheet: Table S2
Table S2 KEGG pathway analysis of differential gut metabolites between autistic and typical developing children
	Map ID	Pathway	Pathway	N1	N2	Ratio(N/M)	P value
1	map00830	Metabolism of cofactors and vitamins	Retinol metabolism	4	6	0.666667	0.0089513
2	map00380	Amino acid metabolism	Tryptophan metabolism	9	17	0.529412	0.000595231
3	map00270	Amino acid metabolism	Cysteine and methionine metabolism	6	12	0.5	0.00795936
4	map00053	Carbohydrate metabolism	Ascorbate and aldarate metabolism	2	4	0.5	0.136332
5	map04977	Digestive system	Vitamin digestion and absorption	7	16	0.4375	0.0099869
6	map00330	Amino acid metabolism	Arginine and proline metabolism	6	17	0.352941	0.0517991
7	map00250	Amino acid metabolism	Alanine, aspartate and glutamate metabolism	6	18	0.333333	0.0673372
8	map00740	Metabolism of cofactors and vitamins	Riboflavin metabolism	2	6	0.333333	0.27173
9	map 00670	Metabolism of cofactors and vitamins	One carbon pool by folate	1	3	0.333333	0.429725
10	map00730	Metabolism of cofactors and vitamins	Thiamine metabolism	1	3	0.333333	0.429725
11	map04974	Digestive system	Protein digestion and absorption	4	13	0.307692	0.164816
12	map 00790	Metabolism of cofactors and vitamins	Folate biosynthesis	2	7	0.285714	0.340641
13	map00590	Lipid metabolism	Arachidonic acid metabolism	5	19	0.263158	0.208117
14	map00230	Nucleotide metabolism	Purine metabolism	5	20	0.25	0.24224
15	map 00760	Metabolism of cofactors and vitamins	Nicotinate and nicotinamide metabolism	1	4	0.25	0.527523
16	map00750	Metabolism of cofactors and vitamins	Vitamin B6 metabolism	1	4	0.25	0.527523
17	map00600	Lipid metabolism	Sphingolipid metabolism	3	14	0.214286	0.436514
18	map00480	Metabolism of other amino acids	Glutathione metabolism	3	15	0.2	0.305901
19	map01040	Lipid metabolism	Biosynthesis of unsaturated fatty acids	2	10	0.2	0.530314
20	map00260	Amino acid metabolism	Glycine, serine and threonine metabolism	2	11	0.181818	0.585055
21	map00310	Amino acid metabolism	Lysine degradation	2	11	0.181818	0.585055
22	map00140	Lipid metabolism	Steroid hormone biosynthesis	3	17	0.176471	0.57616
23	map 00020	Carbohydrate metabolism	Citrate cycle (TCA cycle)	1	7	0.142857	0.732045
24	map01210	Global and overview maps	2-Oxocarboxylic acid metabolism	2	16	0.125	0.789314
25	map 00430	Metabolism of other amino acids	Taurine and hypotaurine metabolism	1	9	0.111111	0.816839
26	map 00350	Amino acid metabolism	Tyrosine metabolism	1	17	0.0588235	0.960771
27	map00360	Amino acid metabolism	Phenylalanine metabolism	1	18	0.0555556	0.967715
N1,number of differential metabolites in the pathway. N2,number of all detected metabolites in the pathway. Ratio=N1/N2. P value, hypergeometric test ,R phyper().
