# Supplementary material for: Alterations in Gut Vitamin and Amino Acid Metabolism are Associated with Symptoms and Neurodevelopment in Children with Autism Spectrum Disorder
Source: J Autism Dev Disord. 2021 Jul 14;52(7):3116–28. doi: 10.1007/s10803-021-05066-w (PMC9213278; doi:10.1007/s10803-021-05066-w)
Supplement: Supplementary file 4 — Supplementary file4 (XLSX 24 kb) Correlations of gut metabolites with ASD symptoms and neurodevelopment levels. [file 10803_2021_5066_MOESM4_ESM.xlsx]

## Sheet: Table S3
Table S3 Correlations of gut metabolites with ASD symptoms and neurodevelopment level
	GDS												SRS												ABC												CARS		6-GSI
	Adaptive behavior		Gross motor		Fine motor		Language		Personal-social behavior		DQ		Social awareness		Social cognition		Social communication		Social motivation		Autistic mannerisms		Total SRS scores		Sensory		Social withdrawal		Stereotypic behavior		Inappropriate speech		Laggard daily living ability		Total ABC scores
	r	P value	r	P value	r	P value	r	P value	r	P value	r	P value	r	P value	r	P value	r	P value	r	P value	r	P value	r	P value	r	P value	r	P value	r	P value	r	P value	r	P value	r	P value	r	P value	r	P value
N-Phenylacetylglutamic acid	-0.011	0.903	-0.009	0.919	0.004	0.967	-0.037	0.689	-0.036	0.698	-0.021	0.821	-0.064	0.484	0.133	0.146	0.063	0.495	0.018	0.846	.196*	0.032	0.098	0.285	0.041	0.654	-0.118	0.201	0.089	0.335	-0.035	0.707	0.094	0.307	0.009	0.923	0.066	0.471	0.101	0.27
Indoleacetyl glutamic acid	-0.035	0.708	-0.05	0.587	-0.054	0.56	0.088	0.337	0.008	0.927	-0.005	0.959	0.029	0.756	0.07	0.448	0.101	0.272	0.174	0.058	.189*	0.039	0.144	0.117	0.005	0.96	0.054	0.557	-0.017	0.851	0.034	0.715	0.029	0.751	0.03	0.748	-0.017	0.85	-0.033	0.723
DL-Glutamine	-.238**	0.009	-.246**	0.007	-0.16	0.082	-0.15	0.101	-0.155	0.092	-.213*	0.019	0.134	0.146	0.109	0.237	.237**	0.009	.330**	0	.257**	0.005	.272**	0.003	0.167	0.069	0.143	0.119	0.046	0.621	0.009	0.924	0.073	0.427	0.119	0.196	0.121	0.189	.184*	0.044
Υ-Aminobutyric acid	0.071	0.443	0.072	0.437	0.031	0.739	0.008	0.928	-0.003	0.978	0.04	0.668	-0.103	0.261	0.03	0.748	0.059	0.519	-0.105	0.253	0.016	0.859	0.041	0.655	-0.053	0.564	-0.064	0.488	-.214*	0.019	-.204*	0.026	-.196*	0.032	-.198*	0.03	0.031	0.733	0.019	0.838
Spermine	-0.146	0.112	-0.002	0.979	-0.172	0.061	-0.111	0.228	-0.086	0.35	-0.122	0.183	0.06	0.512	0.018	0.845	0	0.999	0.093	0.313	0.019	0.839	0.036	0.695	0.158	0.085	-0.024	0.796	0.075	0.416	0.018	0.849	0.103	0.261	0.078	0.396	0.057	0.536	0.062	0.499
Agmatine	0.071	0.439	0.037	0.692	0.023	0.807	0.034	0.715	0.032	0.73	0.045	0.626	-.253**	0.005	-0.161	0.079	-.274**	0.002	-.180*	0.049	-.194*	0.034	-.268**	0.003	-0.051	0.577	-0.019	0.84	-0.003	0.971	-0.097	0.29	-0.041	0.657	-0.054	0.561	-0.136	0.139	0.019	0.834
Creatinine	0.049	0.594	-0.007	0.94	0.066	0.475	0.045	0.629	0.029	0.75	0.044	0.637	-0.075	0.416	-0.053	0.565	-0.017	0.852	-0.017	0.857	-0.015	0.873	-0.036	0.696	-0.07	0.449	-0.093	0.311	-0.065	0.481	0.076	0.41	-0.064	0.485	-0.062	0.502	0.01	0.911	0.04	0.663
N1,N12-Diacetylspermine	-0.01	0.917	-0.004	0.968	0.017	0.851	0.149	0.103	0.136	0.139	0.069	0.454	0.107	0.243	-0.107	0.244	-0.088	0.337	0.019	0.836	-0.033	0.72	-0.048	0.605	0.084	0.361	-0.026	0.778	0.077	0.401	0.124	0.176	-0.008	0.929	0.064	0.484	0.14	0.128	0.071	0.442
p-coumaroylagmatine	-0.155	0.091	-0.088	0.338	-0.127	0.167	-0.149	0.105	-0.115	0.21	-0.147	0.11	-0.08	0.388	-.244**	0.007	-0.146	0.111	-0.161	0.078	-0.149	0.103	-.193*	0.034	-0.089	0.332	-0.129	0.159	-0.102	0.266	-0.095	0.304	-0.104	0.257	-0.144	0.116	-.278**	0.002	-0.032	0.733
Vitamin C	.261**	0.004	.285**	0.002	.215*	0.018	.182*	0.046	.203*	0.026	.257**	0.005	0.116	0.208	0.011	0.908	0.035	0.702	0.016	0.866	0.117	0.202	0.067	0.47	0.038	0.682	0.05	0.585	0.009	0.919	0.062	0.502	-0.013	0.888	0.042	0.651	0.067	0.465	-0.117	0.204
L-Ascorbic acid	-0.135	0.14	-0.097	0.29	-0.051	0.582	-0.054	0.556	-0.054	0.56	-0.088	0.336	0.121	0.189	0.128	0.164	0.126	0.17	0.066	0.476	0.153	0.096	0.148	0.106	0.09	0.328	0.004	0.969	0.052	0.571	0.065	0.484	0.129	0.161	0.084	0.364	0.012	0.896	-0.071	0.438
L (-)-Carnitine	0.003	0.976	0.001	0.988	0.022	0.813	0.044	0.63	-0.002	0.982	0.017	0.85	0.004	0.969	0.041	0.656	0.083	0.366	0.044	0.63	0.134	0.145	0.087	0.347	-0.028	0.761	-0.07	0.445	0.013	0.887	0.051	0.578	0.006	0.952	-0.011	0.902	-0.021	0.821	0.007	0.94
N-Acetyl-L-cysteine	-0.158	0.085	-0.075	0.413	-0.129	0.161	0	0.996	-0.048	0.602	-0.092	0.318	0.019	0.836	0.112	0.224	-0.012	0.897	-0.056	0.543	0.081	0.376	0.031	0.738	0.008	0.927	-0.111	0.228	0.091	0.322	0.045	0.627	0.114	0.216	0.03	0.745	-0.018	0.849	0.02	0.829
S-Aminoethyl-L-cysteine	0.171	0.061	0.102	0.265	0.077	0.404	.250**	0.006	.301**	0.001	.207*	0.023	-0.152	0.097	-0.107	0.246	-.211*	0.021	-0.009	0.919	-0.097	0.29	-0.157	0.087	-0.065	0.478	-0.027	0.773	-0.074	0.421	-0.087	0.345	-0.147	0.109	-0.103	0.264	-0.048	0.604	0.117	0.204
Sulfurous acid	-.319**	0	-.251**	0.006	-.254**	0.005	-.237**	0.009	-0.168	0.067	-.281**	0.002	0.069	0.455	-0.079	0.39	0.023	0.807	-0.023	0.806	-0.015	0.867	-0.006	0.948	0.058	0.532	-0.137	0.135	-0.045	0.629	-0.033	0.719	0.084	0.36	-0.037	0.686	-0.013	0.884	0.052	0.569
DL-Homocysteine	-.199*	0.029	-0.16	0.081	-.197*	0.031	-0.141	0.125	-.189*	0.038	-.200*	0.028	0.094	0.308	0.069	0.453	0.091	0.321	0.131	0.153	0.105	0.253	0.119	0.196	0.066	0.475	0.138	0.132	0.097	0.294	0.178	0.052	0.048	0.602	-0.039	0.676	0.001	0.995	0.11	0.23
Levomefolic acid	0.01	0.911	0.089	0.336	0.021	0.82	0.007	0.94	0.01	0.911	0.028	0.76	-0.029	0.751	-0.006	0.952	-0.116	0.205	-0.109	0.234	0.014	0.883	-0.072	0.437	0.096	0.296	0.108	0.24	0.002	0.982	0.053	0.569	-0.031	0.739	0.066	0.477	0.107	0.244	0.058	0.528
Dihydrofolic acid	-0.061	0.511	-0.132	0.151	0.03	0.745	-0.079	0.389	-0.01	0.915	-0.056	0.542	0.031	0.737	0.03	0.746	0.129	0.159	0.033	0.721	0.123	0.179	0.141	0.124	0.134	0.144	0.121	0.188	0.025	0.79	0.021	0.819	0.089	0.334	0.104	0.257	0.088	0.34	.341**	0
Glutathionyl spermidine	-0.046	0.614	-0.052	0.574	0.026	0.775	0.028	0.758	0.092	0.319	0.011	0.902	-0.037	0.686	-0.071	0.444	-0.097	0.293	-0.064	0.486	-0.012	0.896	-0.076	0.411	-0.022	0.812	-0.084	0.364	0.008	0.93	0.072	0.433	0.037	0.687	-0.003	0.971	0.007	0.94	0.084	0.363
N-feruloyl glycine	0.001	0.99	0.002	0.986	-0.066	0.476	0.151	0.099	0.033	0.72	0.033	0.721	-0.079	0.391	0.053	0.565	-0.018	0.847	0.076	0.411	0.089	0.335	0.031	0.739	0.03	0.747	0.028	0.761	0.109	0.238	-0.08	0.383	-0.105	0.256	0.005	0.959	-0.064	0.49	-0.029	0.756
Fructosyl glycine	-0.159	0.083	-0.171	0.061	-0.082	0.375	-0.1	0.279	-0.155	0.09	-0.148	0.106	0.128	0.164	0.118	0.2	0.013	0.887	0.038	0.681	0.062	0.503	0.072	0.436	0.061	0.51	0.022	0.815	0.013	0.892	-0.027	0.771	0.045	0.625	0.028	0.763	-0.046	0.621	0.049	0.593
8-hydroxy-deoxyguanosine	-.246**	0.007	-0.174	0.057	-.256**	0.005	-0.096	0.297	-0.165	0.072	-.211*	0.021	-0.027	0.773	0.155	0.091	0.132	0.151	-0.008	0.931	0.134	0.146	0.115	0.211	0.147	0.11	0.025	0.789	0.069	0.454	0.031	0.736	0.168	0.066	0.109	0.237	0.005	0.954	0.153	0.095
Retinol	.182*	0.046	0.125	0.173	.236**	0.009	0.073	0.428	0.101	0.272	0.162	0.076	-0.124	0.178	-0.129	0.16	-0.017	0.853	0.054	0.559	-0.05	0.589	-0.054	0.562	-0.015	0.867	-0.1	0.278	0.004	0.967	-0.144	0.116	-0.107	0.244	-0.094	0.307	0.045	0.627	0.171	0.062
b,e-Carotene-3,3'-diol	-0.108	0.239	-0.165	0.072	-0.086	0.353	-0.055	0.551	-0.074	0.424	-0.107	0.244	-0.024	0.793	-0.104	0.261	-0.022	0.807	-0.102	0.267	-0.062	0.502	-0.071	0.441	0.067	0.468	-0.049	0.599	0.006	0.947	-0.051	0.582	-0.097	0.291	-0.035	0.702	-0.132	0.009	-0.105	0.253
All-trans-retinal	-0.006	0.949	-0.081	0.379	-0.023	0.8	-0.115	0.211	-0.018	0.845	0.005	0.958	0.001	0.99	0.152	0.098	-0.011	0.907	0.103	0.265	0.107	0.245	0.076	0.41	-0.006	0.949	.186*	0.042	0.135	0.142	0.093	0.313	0.139	0.13	0.16	0.082	.184*	0.044	-0.039	0.674
4'-apo-beta-carotenal	0.068	0.463	-0.028	0.76	0.09	0.33	0.057	0.536	0.043	0.642	0.056	0.547	0.061	0.511	0.103	0.263	0.03	0.747	-0.06	0.515	0.068	0.46	0.048	0.606	0.158	0.084	.181*	0.048	0.057	0.534	.205*	0.025	0.092	0.319	.189*	0.038	0.129	0.159	0.113	0.22
Riboflavin tetrabutyrate	-0.152	0.097	-0.146	0.11	-0.14	0.127	-0.17	0.064	.195*	0.033	.182*	0.046	0.024	0.798	0.101	0.273	0.124	0.177	0.05	0.591	0.039	0.675	0.095	0.302	0.077	0.402	0.009	0.92	0.045	0.625	-0.098	0.285	0.177	0.054	0.049	0.598	-0.002	0.978	-0.317**	0
Lumichrome	-0.152	0.098	-0.143	0.118	-0.095	0.302	-0.062	0.502	-0.083	0.368	-0.119	0.194	0.06	0.513	0.008	0.932	0.052	0.575	-.196*	0.032	0.125	0.174	0.103	0.261	0.048	0.604	-0.079	0.394	0.114	0.216	-0.021	0.819	0.052	0.57	0.025	0.784	0.038	0.68	0.15	0.103
(+)-Riboflavin	.264**	0.004	.216*	0.018	.219*	0.016	-0.158	0.086	.215*	0.018	.242**	0.008	-0.023	0.807	-0.145	0.114	0.048	0.606	0.05	0.59	-0.153	0.096	-0.096	0.297	-0.09	0.327	-0.025	0.786	0.027	0.771	-0.159	0.083	-0.152	0.097	0.013	0.891	-0.046	0.619	0.109	0.235
Thiamine pyrophosphate	-0.064	0.49	0.022	0.811	0.027	0.773	-0.035	0.704	-0.002	0.985	-0.015	0.873	0.005	0.961	0.052	0.569	-0.096	0.297	0.094	0.309	0.042	0.65	0.002	0.98	-0.044	0.636	-0.016	0.864	-0.112	0.225	0.035	0.708	0.011	0.903	-0.038	0.682	0.086	0.353	0.134	0.143
Indole-2-carboxylic acid	-0.165	0.071	-0.17	0.063	-0.179	0.098	-0.152	0.033	-0.131	0.154	-0.144	0.117	0.051	0.582	0.029	0.756	0.065	0.481	0.069	0.455	0.101	0.274	0.08	0.387	0.067	0.467	-0.08	0.385	0.105	0.252	-0.131	0.153	0.144	0.117	0.018	0.843	-0.116	0.207	0.046	0.621
6-Hydroxymelatonin	0.039	-0.242	0.023	-0.133	-0.003	-0.197	0.122	-0.126	0.079	-0.155	0.072	-0.206	0.003	0.112	-0.03	0.101	-.183*	-0.03	0.015	0.203	-0.072	-0.029	-0.097	-0.035	-0.042	-0.089	-0.098	0.155	0.03	0.129	-0.084	0.01	0.01	0.079	-0.032	0.135	-0.047	0.225	0.078	0.397
5-Hydroxy-indoleacetic acid	-.242**	0.008	-0.133	0.149	-.197*	0.031	-0.126	0.169	-0.155	0.09	-.206*	0.024	0.112	0.225	0.101	0.27	-0.03	0.742	.203*	0.026	-0.029	0.752	-0.035	0.702	-0.089	0.334	0.155	0.09	0.129	0.159	0.01	0.917	-0.079	0.39	-0.135	0.142	.193*	0.035	0.071	0.438
Xanthurenic acid	-0.057	0.533	-0.042	0.645	-0.03	0.746	0.033	0.723	0.029	0.751	-0.014	0.879	0.026	0.777	-0.076	0.41	-0.046	0.617	-0.094	0.309	-0.15	0.102	-0.089	0.336	0.077	0.4	0.048	0.601	-0.055	0.551	-0.024	0.792	-0.041	0.658	0.001	0.992	0.064	0.487	0.017	0.855
N-Feruloylserotonin	-0.113	0.221	0.041	0.66	-0.1	0.277	-0.058	0.532	-0.018	0.841	-0.062	0.504	-0.052	0.57	0.137	0.136	-0.032	0.725	0.066	0.472	.224*	0.014	0.121	0.189	.198*	0.031	-0.018	0.848	0.123	0.181	-0.024	0.793	0.061	0.507	0.083	0.366	0.046	0.616	0.276**	0.002
Serotonin	-.321**	0	-.184*	0.045	-.254**	0.005	-0.156	0.09	-.207*	0.023	-.245**	0.007	-0.012	0.893	0.076	0.41	0.058	0.531	-0.079	0.394	0.041	0.659	0.032	0.728	.210*	0.022	0.05	0.59	0.011	0.902	-0.027	0.766	0.109	0.238	0.084	0.359	0.024	0.792	0.185*	0.044
5-Hydroxy-DL-tryptophan	.212*	0.02	.243**	0.008	.210*	0.021	.197*	0.031	0.16	0.08	.231*	0.011	-0.073	0.428	-0.143	0.12	-.184*	0.045	-0.178	0.052	-.248**	0.006	-.215*	0.018	-.180*	0.05	-0.126	0.172	-0.115	0.211	-.198*	0.03	-.183*	0.045	-.212*	0.02	-0.125	0.173	-0.006	0.944
5-Hydroxy-N-formylkynurenine	-.250**	0.006	-.185*	0.043	-.258**	0.004	-0.092	0.319	-0.168	0.067	-.214*	0.019	-0.009	0.926	0.129	0.162	0.127	0.166	-0.012	0.898	0.117	0.202	0.105	0.252	0.161	0.079	0.021	0.82	0.073	0.429	0.028	0.762	.185*	0.043	0.115	0.212	0.003	0.97	.221*	0.015
Phosphopantothenic acid	-0.11	0.231	-0.13	0.157	-0.16	0.081	-0.078	0.399	-0.011	0.908	-0.111	0.227	0.086	0.352	-0.083	0.37	-0.09	0.331	-0.005	0.96	-0.015	0.869	-0.046	0.615	0.01	0.91	-0.107	0.244	0.037	0.691	-0.002	0.984	0.081	0.378	-0.005	0.958	-0.106	0.249	0.029	0.757
Pyridoxamine	0.055	0.551	0.019	0.838	0.081	0.38	0.108	0.241	0.109	0.234	0.08	0.388	0.091	0.323	0.083	0.369	0.041	0.654	-0.148	0.107	0.009	0.926	0.079	0.389	-0.032	0.729	-.204*	0.025	-.216*	0.018	-0.128	0.165	-0.09	0.33	-.197*	0.031	-.183*	0.045	0.124	0.178
S-(PGA1)-glutathione	0.03	0.746	-0.009	0.922	0.172	0.061	0.016	0.866	0.076	0.411	0.064	0.484	0.084	0.361	-0.009	0.921	0.016	0.865	-0.009	0.926	0.027	0.766	0.022	0.813	0.069	0.455	0.082	0.371	.223*	0.014	0.091	0.324	0.173	0.059	0.176	0.055	0.173	0.059	.212*	0.02
11-Deoxy prostaglandin F2β	0.159	0.082	0.157	0.087	0.083	0.367	0.169	0.064	0.162	0.077	0.166	0.07	-0.066	0.471	-0.074	0.42	-0.093	0.312	0.009	0.922	-0.068	0.459	-0.079	0.393	-0.022	0.815	-.205*	0.024	-0.156	0.089	0.008	0.931	-0.11	0.232	-0.146	0.112	-0.069	0.457	-0.016	0.858
5-trans prostaglandin F2β	.204*	0.025	.237**	0.009	0.142	0.121	.247**	0.007	.251**	0.006	.245**	0.007	-0.129	0.16	-0.105	0.253	-0.129	0.161	0.009	0.92	-0.137	0.137	-0.126	0.169	-0.001	0.995	-.186*	0.041	-.196*	0.032	-0.006	0.946	-0.111	0.229	-0.151	0.1	-0.074	0.42	0.12	0.191
Arachidic acid	0.139	0.129	0.116	0.206	0.176	0.055	0.164	0.074	0.118	0.201	0.164	0.073	0.006	0.952	0.001	0.989	0.082	0.372	-0.074	0.423	0.002	0.986	0.02	0.828	0.058	0.531	0.037	0.685	-0.078	0.395	0.069	0.452	-0.111	0.227	-0.006	0.95	-0.057	0.534	-0.006	0.948
15-Deoxy-12,14-prostaglandin A1	0.057	0.539	0.009	0.919	0.08	0.383	-0.039	0.675	0.043	0.641	0.077	0.401	-0.059	0.519	-0.05	0.59	-0.076	0.409	-0.019	0.835	-.211*	0.021	-0.108	0.239	0.023	0.799	-0.031	0.736	-0.074	0.422	-0.006	0.952	-0.013	0.89	-0.033	0.724	0.032	0.73	-0.093	0.31
20-hydroxy-leukotriene E4	0.089	0.335	0.157	0.086	0.142	0.121	0.096	0.298	0.138	0.132	0.161	0.079	-0.063	0.496	-0.078	0.397	-0.154	0.092	-0.071	0.442	-0.14	0.127	-0.17	0.063	-0.093	0.314	-0.092	0.319	-0.021	0.819	-0.059	0.522	0.014	0.882	-0.071	0.443	-0.142	0.123	0.023	0.8
r, Spearman correlation coefficient.The * symbol in each lattice represent a significant correlation. * P < 0.05, ** P < 0.01. GDS=Gesell Developmental Scale , ABC=Autism Behavior Checklist , SRS=Social Responsiveness Scale,CARS=Childhood Autism Rating Scale, DQ=development quotient scores
